# Supplementary material
Source: PubMed Central journal article supplement (PMC2978973)
Supplement: mmc1.pdf [file mmc1.pdf]

Supplemental Data

Mutations in Myosin Light Chain Kinase

Cause Familial Aortic Dissections

Li Wang, Dong-chuan Guo, Jiumei Cao, Limin Gong, Kristine E Kamm, Ellen Regalado, Li Li, Sanjay Shete, Wei-Qi He, Min-Sheng Zhu, Stephan Offermanns, Dawna Gilchrist, John Eleftheriades, James T Stull, and Dianna M Milewicz

Table S1. Clinical Data of Family Members with *MYLK* Mutations

| Family ID           | ID     | Age*  | Gender | Aortic Disease Presentation<br>(size of aorta) | Age at aortic<br>disease onset | Other medical<br>conditions      |
|---------------------|--------|-------|--------|------------------------------------------------|--------------------------------|----------------------------------|
| TAA026              | I:2    | 71    | F      | Type A dissection                              | 54                             |                                  |
| S1759P              | II:2   | 49    | F      | Type A dissection (4 cm)                       | 43                             | IBS                              |
| Caucasian           | II:3   | 48    | M      | Type A dissection                              | 35                             | liver hemangiomas                |
| TAA400              | II:2   | d. 91 | F      | Type A dissection                              | 63                             | Left bundle branch block         |
| R1480X <sup>‡</sup> | II:3   | d.72  | M      | Type A dissection                              | 72                             | Diverticulitis, AODM             |
| Caucasian           | II:7   | d.70  | M      | Sudden death                                   | 70                             |                                  |
|                     | II:10  | d.86  | F      | Type A dissection<br>(minimal enlargement)     | 75                             | Paroxysmal atrial<br>tachycardia |
|                     | II:11  | d.78  | M      | Type B dissection                              | 78                             | HTN, obesity                     |
|                     | II:13  | d.70s | F      | Aortic dissection                              | 70s                            |                                  |
|                     | II:14  | d.79  | F      | Sudden death                                   | 79                             | Colon polyps                     |
|                     | III:1  | 76    | M      | Unknown                                        |                                | TIA, duodenal ulcer              |
|                     | III:4  | 69    | M      | Normal                                         |                                | Diverticulitis                   |
|                     | III:7  | 63    | F      | Normal                                         |                                |                                  |
|                     | III:10 | 51    | M      | Type A dissection                              | 37                             |                                  |
|                     | III:14 | 63    | F      | Normal                                         |                                |                                  |
|                     | III:15 | 59    | F      | Normal                                         |                                |                                  |
|                     | IV:2   | 18    | M      | Type B dissection                              | 16                             |                                  |

\*, current age or age at death (d); <sup>‡</sup>, includes individuals with a confirmed mutation and obligate carriers; Normal, no aortic abnormality was detected on echocardiogram, CT or MRI; Unknown, no results available; IBS, irritable bowel syndrome, HTN, hypertension, AODM, adult onset diabetes mellitus, TIA, transient ischemic attacks.
